# Supplementary material for: Nano-carbon: preparation, assessment, and applications for NH3 gas sensor and electromagnetic interference shielding
Source: Royal Society of Chemistry journal article supplement (doi:10.1039/c6ra17422a), 2016-01-01
Supplement: c6ra17422a1.pdf [file c6ra17422a1.pdf]

### **Supporting Information**

#### **Nano-carbon: Preparation, Assessment, and Applications for NH<sub>3</sub> Gas Sensor and Electromagnetic Interference Shielding**

Ashok D. Ugale, Resham V. Jagtap, Dnyandeo K. Pawar, Suwarna S. Datar, Sangeeta N. Kale,  
and Prashant S. Alegaonkar\*

Department of Applied Physics, Defence Institute of Advance Technology, Girinagar, Pune  
411025, MS, India

---

\* Corresponding author: Prashant S. Alegaonkar (Tel.: +91-20-2430 4592, e-mail: prashantalegaonkar@dait.ac.in)

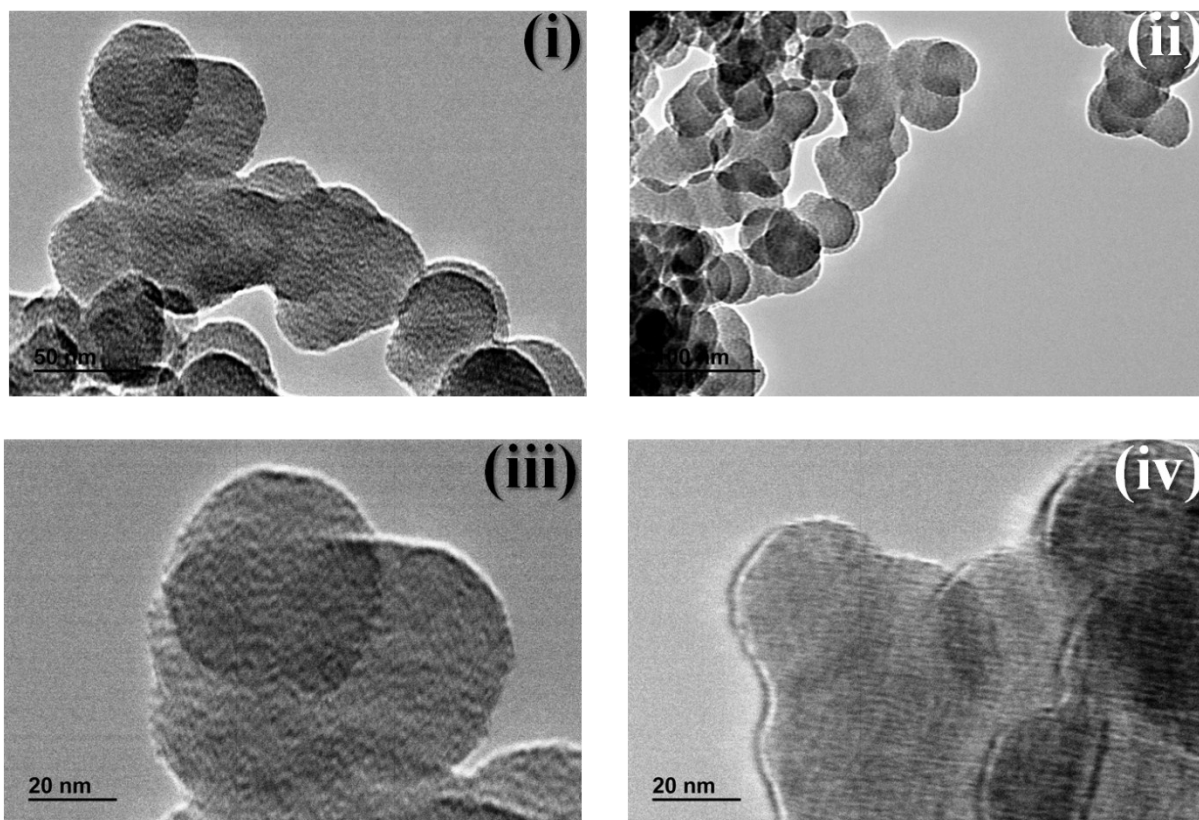

**Figure S1: Recorded HRTEM images of nano-carbon.**

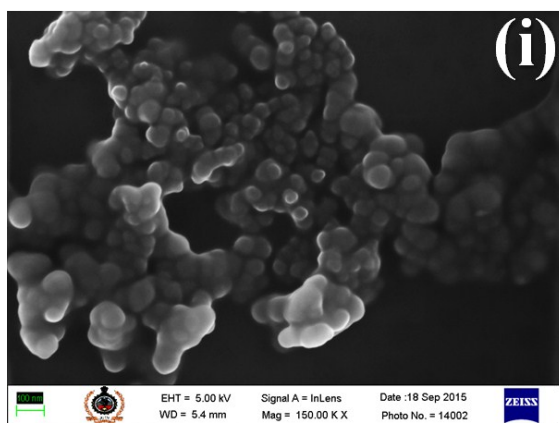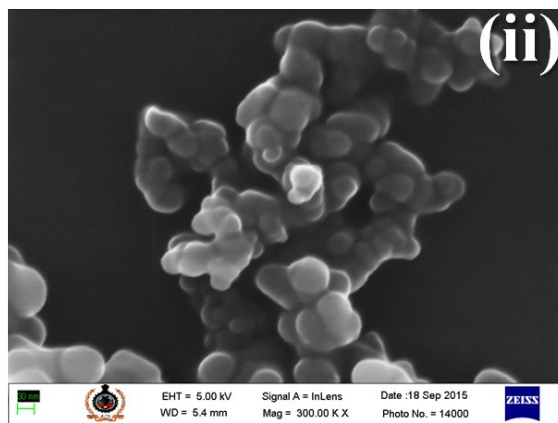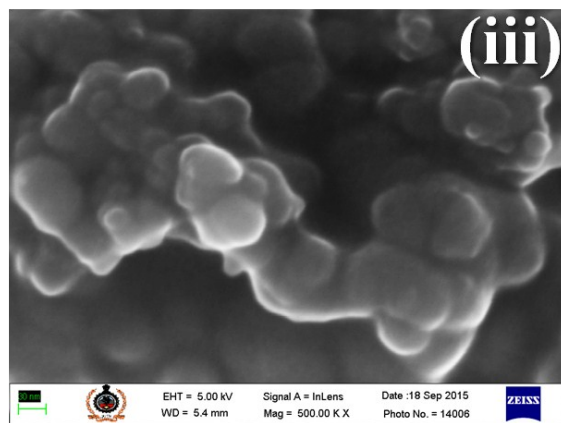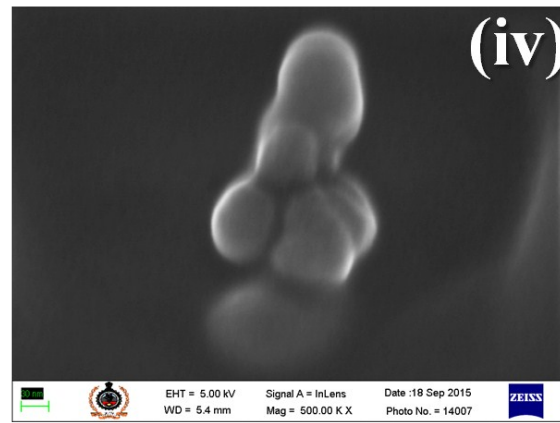

**Figure S2: Recorded FESEM images of nano-carbon.**

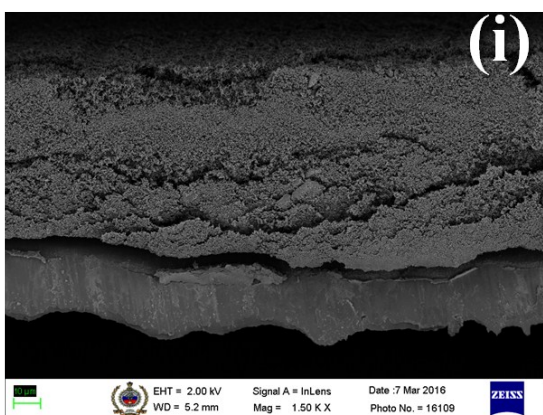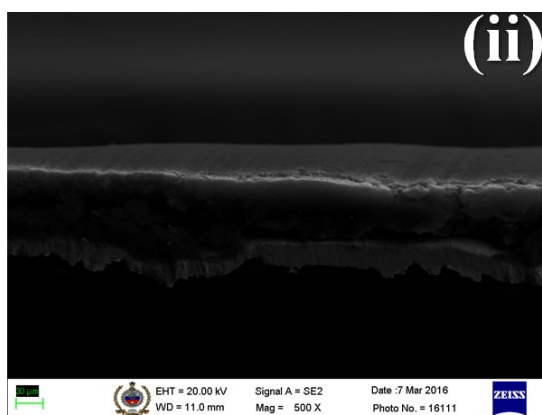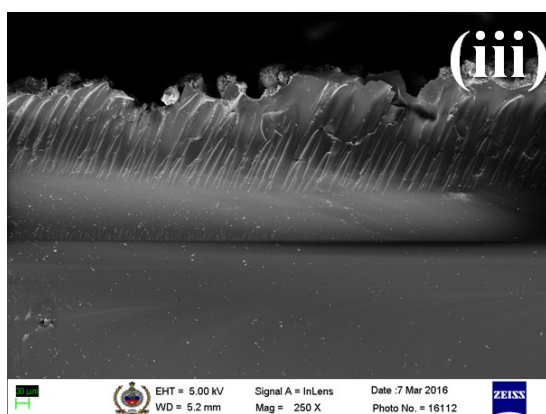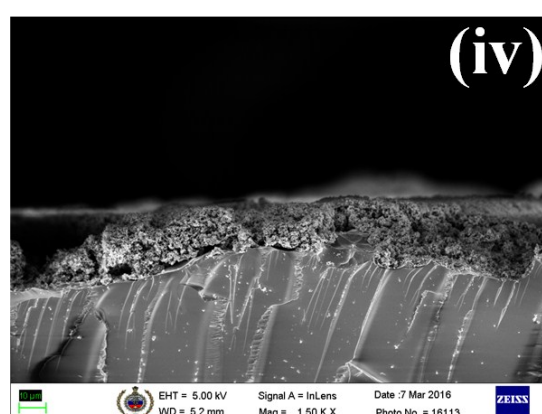

**Figure S3: Recorded cross view FESEM images of nano-carbon grown on copper and glass substrates.**

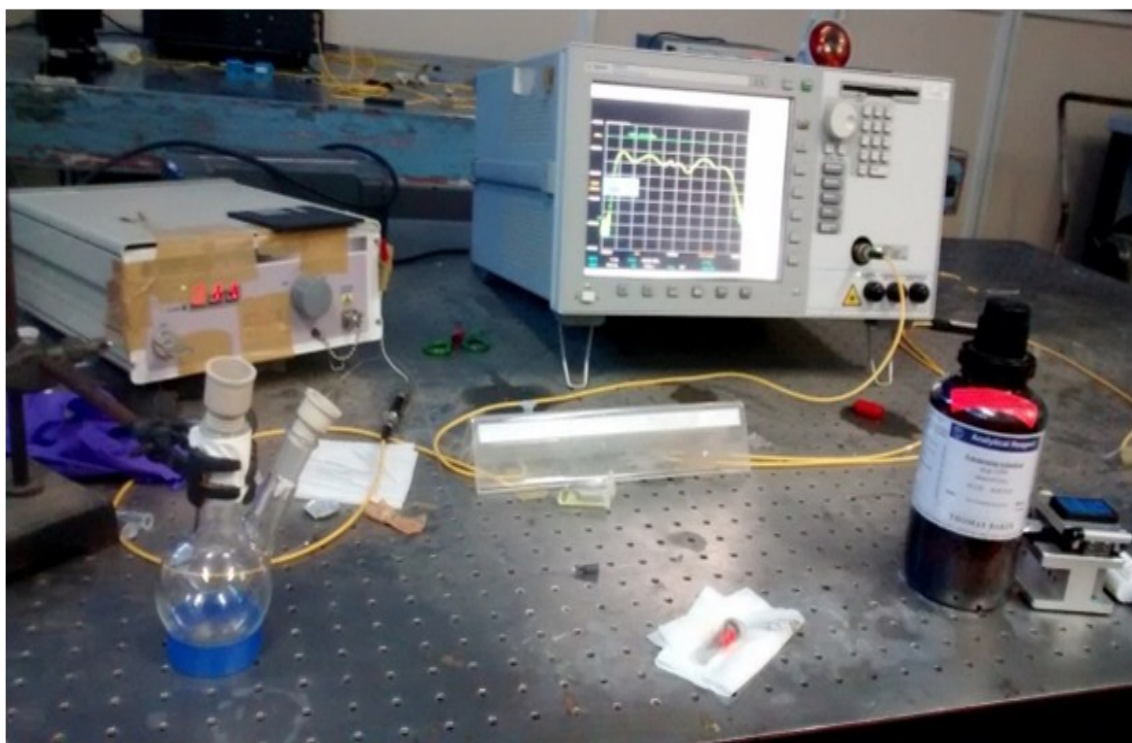

**Figure S4: Set up of Fabry-Perot interferometer optical fiber gas sensor.**

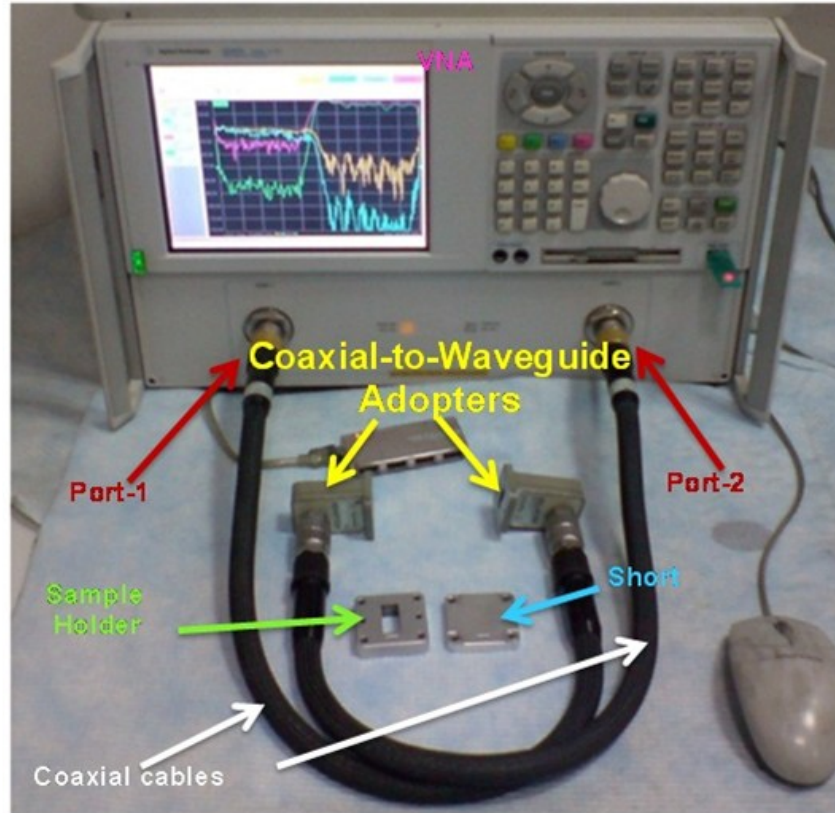

**Figure S5: Experimental arrangement for performing X band measurements, indicating coaxial to waveguide adapter, sample holder, co-axial cables connected to ports.**
